# Supplementary material for: Whole-Brain Map of Long-Range Monosynaptic Inputs to Different Cell Types in the Amygdala of the Mouse
Source: Springer Nature journal article supplement (doi:10.1007/s12264-020-00545-z), 2020-07-20
Supplement: MOESM1 [file 25637764]

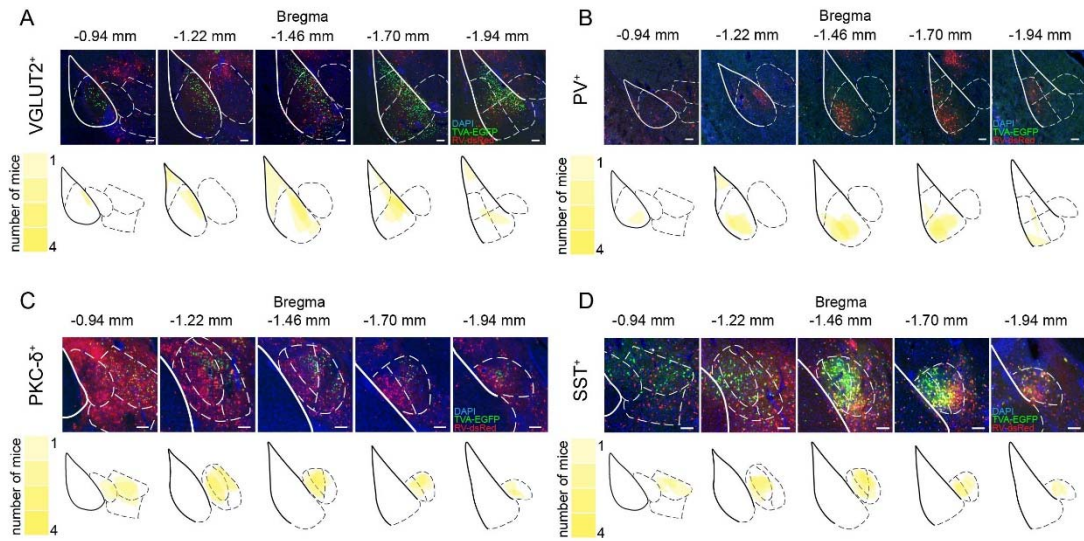

**Fig. S1** Starter cell injection sites. **A–D** Representative images (upper) and overlays (lower) of starter cells from rostral to caudal BLA in one *VGLUT2-IRES-Cre* mouse (**A**), from rostral to caudal BLA in one *PV-IRES-Cre* mouse (**B**), from rostral to caudal CeA in one *PKC-δ-IRES-Cre* mouse (**C**), and from rostral to caudal CeA in one *SST-IRES-Cre* mouse ( $n = 4$  mice/group; scale bars, 100 μm).

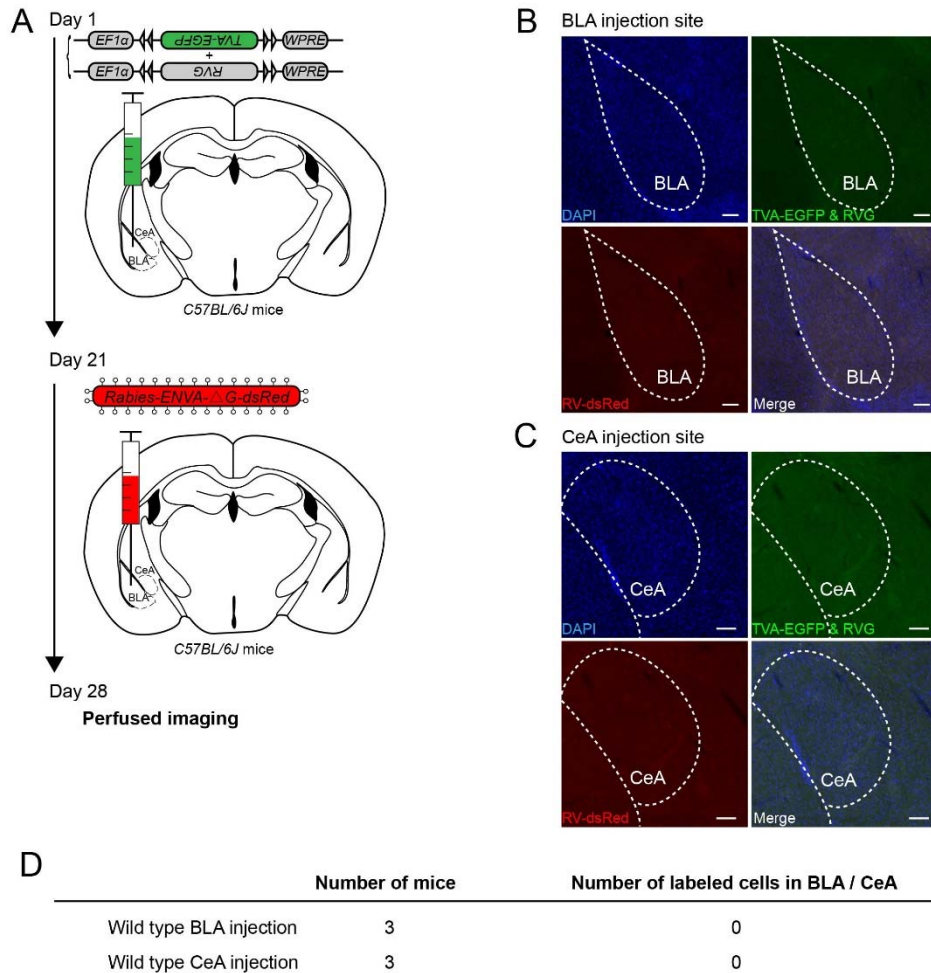

**Fig. S2** Control experiment demonstrating the specificity of the retrograde trans-synaptic tracing approach. **A** Timeline of virus injection into the BLA or CeA of wild-type mice for retrograde trans-synaptic tracing. **B** Representative images of BLA neurons in wild-type mice. No TVA-EGFP or RV-dsRed fluorescence-positive cells were observed. Scale bars, 100  $\mu$ m. **C** Representative images of CeA neurons in wild-type mice. No TVA-EGFP or RV-dsRed fluorescence-positive cells were observed. Scale bars, 100  $\mu$ m. **D** Quantification of labeled cells in BLA and CeA.

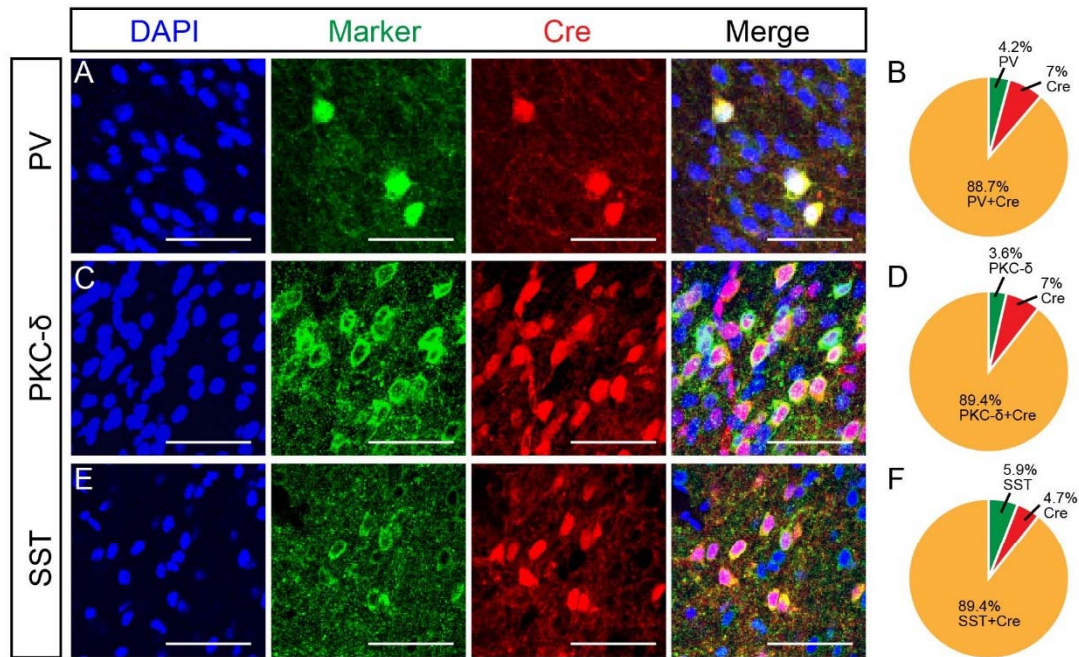

**G**

| Mouse number            | Co-expressed | Marker only | Cre only |
|-------------------------|--------------|-------------|----------|
| PV::Ai14 #1             | 72           | 6           | 8        |
| PV::Ai14 #2             | 116          | 2           | 8        |
| PV::Ai14 #3             | 64           | 4           | 4        |
| PKC- $\delta$ ::Ai14 #1 | 490          | 16          | 30       |
| PKC- $\delta$ ::Ai14 #2 | 212          | 12          | 18       |
| PKC- $\delta$ ::Ai14 #3 | 244          | 10          | 26       |
| SST::Ai14 #1            | 250          | 22          | 16       |
| SST::Ai14 #2            | 284          | 14          | 14       |
| SST::Ai14 #3            | 224          | 14          | 10       |

**Fig. S3** Co-expression of Cre recombinase and cell-type-specific markers. **A** Representative images of BLA PV<sup>+</sup> neurons co-expressing Cre recombinase from *PV-Cre::Ai14* mice. Scale bars, 50  $\mu$ m. **B** Pie chart representing fractions of PV-positive, Cre-positive, and co-expressing neurons in BLA ( $n = 3$  mice). **C** Representative images of CeA PKC- $\delta$ <sup>+</sup> neurons co-expressing Cre recombinase from *PKC- $\delta$ -Cre::Ai14* mice. Scale bars, 50  $\mu$ m. **D** Pie chart representing fractions of PKC- $\delta$ -positive, Cre-positive, and co-expressing neurons in CeA ( $n = 3$  mice). **E** Representative images of CeA SST<sup>+</sup> neurons co-expressing Cre

recombinase from *SST-Cre::Ai14* mice. Scale bars, 50  $\mu\text{m}$ . **F** Pie chart representing fractions of SST-positive, Cre-positive, and co-expressing neurons in CeA ( $n = 3$  mice). **G** Numbers of neurons in each Cre::Ai14 mouse.

**Table S1. List of brain areas (<1% of total inputs).**

| VGLUT2 <sup>+</sup>        |         |          |          |         |         |         |         |         |         |         |
|----------------------------|---------|----------|----------|---------|---------|---------|---------|---------|---------|---------|
|                            | AAA     | Acb      | CM       | DpMe    | DTT     | HDB     | IL      | IMD     | IPAC    | LH      |
| Mean (%)                   | 0.8348  | 0.7479   | 0.9457   | 0.4454  | 0.0731  | 0.649   | 0.05406 | 0.5858  | 0.5981  | 0.3028  |
|                            | LPO     | MD       | MO       | PAG     | PF      | PrL     | SPF     | VIS     | VPM     |         |
| Mean (%)                   | 0.1566  | 0.7551   | 0.1462   | 0.2611  | 0.2515  | 0.2071  | 0.6161  | 0.5092  | 0.9774  |         |
|                            |         |          |          |         |         |         |         |         |         |         |
| PV <sup>+</sup>            |         |          |          |         |         |         |         |         |         |         |
|                            | AAA     | AD       | Ahi      | AH      | AM      | AOP     | BST     | C1      | Cg      | CM      |
| Mean (%)                   | 0.5648  | 0.05479  | 0.3488   | 0.06849 | 0.04795 | 0.0411  | 0.2055  | 0.1575  | 0.09091 | 0.5908  |
|                            | CxA     | DI       | DP       | DTT     | Eth     | HDB     | I       | IL      | IMD     | IP      |
| Mean (%)                   | 0.5671  | 0.1438   | 0.04795  | 0.0137  | 0.03425 | 0.4384  | 0.06164 | 0.02055 | 0.441   | 0.08991 |
|                            | LH      | LO       | LOT      | LPO     | MCPO    | MD      | MG      | MnPO    | MO      | MPA     |
| Mean (%)                   | 0.7136  | 0.006849 | 0.09589  | 0.22    | 0.7361  | 0.289   | 0.4033  | 0.0274  | 0.03425 | 0.119   |
|                            | MS      | Pa4      | PAG      | PF      | PIL     | PMCo    | PPTg    | PrL     | PSTh    | PT      |
| Mean (%)                   | 0.0274  | 0.006849 | 0.0137   | 0.7889  | 0.2192  | 0.5137  | 0.04795 | 0.0411  | 0.2955  | 0.8207  |
|                            | Re      | Rh       | S        | SG      | SNC     | SNR     | STh     | Tu      | VIS     | VDB     |
| Mean (%)                   | 0.05479 | 0.0137   | 0.894    | 0.05479 | 0.3452  | 0.197   | 0.3322  | 0.2731  | 0.1334  | 0.06849 |
|                            | VMPO    | VPM      | VTA      | VTT     | ZI      |         |         |         |         |         |
| Mean (%)                   | 0.09849 | 0.116    | 0.03425  | 0.0137  | 0.07721 |         |         |         |         |         |
|                            |         |          |          |         |         |         |         |         |         |         |
| PKC- $\delta$ <sup>+</sup> |         |          |          |         |         |         |         |         |         |         |
|                            | AAA     | ACo      | ADP      | AH      | Ahi     | Apir    | APT     | Arc     | BIC     | CA1     |
| Mean (%)                   | 0.2834  | 0.01134  | 0.09296  | 0.1849  | 0.5759  | 0.883   | 0.1601  | 0.9455  | 0.1439  | 0.5979  |
|                            | Cg      | DLG      | DLO      | DP      | DpG     | DR      | DTT     | ECIC    | HDB     | IF      |
| Mean (%)                   | 0.08163 | 0.4451   | 0.01587  | 0.5416  | 0.1905  | 0.5332  | 0.1671  | 0.1956  | 0.2426  | 0.05442 |
|                            | IGL     | IL       | InWh     | IP      | LA      | Lent    | LGP     | LHb     | LO      | M1      |
| Mean (%)                   | 0.4195  | 0.4273   | 0.1043   | 0.3537  | 0.2041  | 0.2726  | 0.3174  | 0.8321  | 0.295   | 0.04761 |
|                            | MCPO    | Me       | MnPO     | MnR     | MO      | MS      | op      | Pa      | PAG     | Pe      |
| Mean (%)                   | 0.2539  | 0.3061   | 0.1859   | 0.1002  | 0.2903  | 0.1791  | 0.1519  | 0.3673  | 0.9515  | 0.3605  |
|                            | PF      | PH       | PIL      | PLCo    | PMCo    | PN      | PP      | PPT     | PR      | PRh     |
| Mean (%)                   | 0.4815  | 0.8583   | 0.2653   | 0.09296 | 0.653   | 0.3378  | 0.3117  | 0.04081 | 0.07256 | 0.2933  |
|                            | PrL     | PSTh     | PT       | pv      | py      | RCH     | Rli     | RRF     | RSA     | Rt      |
| Mean (%)                   | 0.205   | 0.1337   | 0.2086   | 0.6371  | 0.1451  | 0.1519  | 0.04599 | 0.6703  | 0.2222  | 0.2744  |
|                            | S       | S1       | SC       | SCh     | SFI     | SFO     | SG      | SNC     | SNL     | SPF     |
| Mean (%)                   | 0.04535 | 0.7587   | 0.5893   | 0.297   | 0.03628 | 0.03401 | 0.1315  | 0.5966  | 0.02721 | 0.02721 |
|                            | SubB    | SuG      | TeA      | VIS     | VDB     | VLG     | VLPO    | VMH     | VO      | VPM     |
| Mean (%)                   | 0.1886  | 0.06122  | 0.1973   | 0.8998  | 0.03401 | 0.8221  | 0.288   | 0.7651  | 0.1756  | 0.3157  |
|                            | VTA     | ZI       |          |         |         |         |         |         |         |         |
| Mean (%)                   | 0.5984  | 0.7958   |          |         |         |         |         |         |         |         |
|                            |         |          |          |         |         |         |         |         |         |         |
| SST <sup>+</sup>           |         |          |          |         |         |         |         |         |         |         |
|                            | AAA     | Acb      | AD       | AH      | Apir    | AV      | BIC     | Cg      | DG      | DM      |
| Mean (%)                   | 0.26    | 0.4022   | 0.07161  | 0.2628  | 0.237   | 0.09717 | 0.3091  | 0.06562 | 0.1389  | 0.1183  |
|                            | DP      | DR       | DT       | EP      | Eth     | Gus     | HDB     | IAD     | IAM     | IL      |
| Mean (%)                   | 0.4517  | 0.6637   | 0.137    | 0.8378  | 0.07407 | 0.2579  | 0.7936  | 0.0537  | 0.1683  | 0.1991  |
|                            | IM      | IMD      | IPAC     | LA      | LGP     | LO      | LP      | LPO     | LS      | M1      |
| Mean (%)                   | 0.1602  | 0.2647   | 0.609    | 0.2521  | 0.102   | 0.05778 | 0.6959  | 0.8796  | 0.5772  | 0.6312  |
|                            | MCLH    | MCPO     | MD       | Me      | MiTg    | MO      | MPA     | MPO     | MS      | NDB     |
| Mean (%)                   | 0.04814 | 0.3029   | 0.5977   | 0.3099  | 0.01576 | 0.6176  | 0.1623  | 0.1287  | 0.1662  | 0.1051  |
|                            | ORB     | PAG      | PAL      | PB      | PERI    | PF      | PH      | PIL     | PL      | PP      |
| Mean (%)                   | 0.0893  | 0.1208   | 0.2784   | 0.04727 | 0.5542  | 0.7293  | 0.04727 | 0.6067  | 0.04202 | 0.1956  |
|                            | PPTg    | PrL      | PT       | Re      | Rh      | RR      | SG      | SNC     | SNL     | Sub     |
| Mean (%)                   | 0.09754 | 0.1286   | 0.5098   | 0.136   | 0.06283 | 0.0841  | 0.1133  | 0.343   | 0.2705  | 0.01051 |
|                            | SubB    | TE       | TU       | VIS     | VMH     | VPM     | VTA     |         |         |         |
| Mean (%)                   | 0.5463  | 0.02364  | 0.005253 | 0.7244  | 0.2721  | 0.1167  | 0.07407 |         |         |         |

**Table S2. Details of statistical analysis.**

|         |               |                                   |         |
|---------|---------------|-----------------------------------|---------|
| Fig. 6A | Two-way ANOVA | Sidak's multiple comparisons test | P-value |
|---------|---------------|-----------------------------------|---------|

|  |                                         |      |                           |
|--|-----------------------------------------|------|---------------------------|
|  | VGLUT2 <sup>+</sup> vs. PV <sup>+</sup> |      | < 0.0001                  |
|  |                                         | AAA  | adj. <i>P</i> ><br>0.9999 |
|  |                                         | AI   | adj. <i>P</i> ><br>0.9999 |
|  |                                         | Au   | adj. <i>P</i> =<br>0.9105 |
|  |                                         | BST  | adj. <i>P</i> ><br>0.9999 |
|  |                                         | CA1  | adj. <i>P</i> <<br>0.0001 |
|  |                                         | CPu  | adj. <i>P</i> <<br>0.0001 |
|  |                                         | DR   | adj. <i>P</i> ><br>0.9999 |
|  |                                         | Ect  | adj. <i>P</i> ><br>0.9999 |
|  |                                         | GI   | adj. <i>P</i> ><br>0.9999 |
|  |                                         | IPAC | adj. <i>P</i> ><br>0.9999 |
|  |                                         | LEnt | adj. <i>P</i> =           |

|  |  |      |                           |
|--|--|------|---------------------------|
|  |  |      | 0.1925                    |
|  |  | MCPO | adj. <i>P</i> ><br>0.9999 |
|  |  | MG   | adj. <i>P</i> ><br>0.9999 |
|  |  | MO   | adj. <i>P</i> ><br>0.9999 |
|  |  | Pir  | adj. <i>P</i> <<br>0.0001 |
|  |  | Po   | adj. <i>P</i> ><br>0.9999 |
|  |  | PRh  | adj. <i>P</i> =<br>0.8415 |
|  |  | PVT  | adj. <i>P</i> ><br>0.9999 |
|  |  | TeA  | adj. <i>P</i> ><br>0.9999 |
|  |  | SI   | adj. <i>P</i> =<br>0.9986 |

|         |                              |                                   |                 |
|---------|------------------------------|-----------------------------------|-----------------|
| Fig. 6B | Two-way ANOVA                | Sidak's multiple comparisons test | <i>P</i> -value |
|         | PKC- $\delta^+$ vs. SST $^+$ |                                   | < 0.0001        |

|  |  |      |                      |
|--|--|------|----------------------|
|  |  | Acb  | adj. $P =$<br>0.9954 |
|  |  | AI   | adj. $P >$<br>0.9999 |
|  |  | Au   | adj. $P =$<br>0.1524 |
|  |  | BST  | adj. $P >$<br>0.9999 |
|  |  | CA1  | adj. $P <$<br>0.0001 |
|  |  | DI   | adj. $P >$<br>0.9999 |
|  |  | DM   | adj. $P >$<br>0.9999 |
|  |  | DpMe | adj. $P >$<br>0.9999 |
|  |  | Ect  | adj. $P >$<br>0.9999 |
|  |  | IPAC | adj. $P >$<br>0.9999 |
|  |  | LEnt | adj. $P =$<br>0.9401 |



|  |  |      |                      |
|--|--|------|----------------------|
|  |  | LH   | adj. $P >$<br>0.9999 |
|  |  | LPO  | adj. $P >$<br>0.9999 |
|  |  | LS   | adj. $P >$<br>0.9999 |
|  |  | MG   | adj. $P >$<br>0.9999 |
|  |  | MPA  | adj. $P =$<br>0.9989 |
|  |  | Pir  | adj. $P >$<br>0.9999 |
|  |  | Po   | adj. $P >$<br>0.9999 |
|  |  | PRh  | adj. $P >$<br>0.9999 |
|  |  | PSTh | adj. $P >$<br>0.9999 |
|  |  | PVT  | adj. $P =$<br>0.6319 |
|  |  | S    | adj. $P =$<br>0.9995 |

|  |  |     |                      |
|--|--|-----|----------------------|
|  |  | TeA | adj. $P =$<br>0.0023 |
|  |  | SI  | adj. $P >$<br>0.9999 |

| Fig. 6C | Two-way ANOVA                           | Sidak's multiple comparisons test | $P$ -value           |
|---------|-----------------------------------------|-----------------------------------|----------------------|
|         | VGLUT2 <sup>+</sup> vs. PV <sup>+</sup> |                                   | < 0.0001             |
|         |                                         | Isocortex                         | adj. $P >$<br>0.9999 |
|         |                                         | Pallidum                          | adj. $P =$<br>0.9873 |
|         |                                         | Striatum                          | adj. $P <$<br>0.0001 |
|         |                                         | Hippocampal formation             | adj. $P >$<br>0.9999 |
|         |                                         | Thalamus                          | adj. $P =$<br>0.9997 |
|         |                                         | Hypothalamus                      | adj. $P >$<br>0.9999 |
|         |                                         | Midbrain                          | adj. $P >$<br>0.9999 |
|         |                                         | Olfactory areas                   | adj. $P =$           |

|  |  |  |        |
|--|--|--|--------|
|  |  |  | 0.0155 |
|--|--|--|--------|

| Fig. 6D | Two-way ANOVA                | Sidak's multiple comparisons test | <i>P</i> -value           |
|---------|------------------------------|-----------------------------------|---------------------------|
|         | PKC- $\delta^+$ vs. SST $^+$ |                                   | < 0.0001                  |
|         |                              | Isocortex                         | adj. <i>P</i> =<br>0.0114 |
|         |                              | Pallidum                          | adj. <i>P</i> ><br>0.9999 |
|         |                              | Striatum                          | adj. <i>P</i> <<br>0.0001 |
|         |                              | Hippocampal formation             | adj. <i>P</i> =<br>0.0250 |
|         |                              | Thalamus                          | adj. <i>P</i> =<br>0.8942 |
|         |                              | Hypothalamus                      | adj. <i>P</i> =<br>0.3411 |
|         |                              | Midbrain                          | adj. <i>P</i> =<br>0.9546 |
|         |                              | Olfactory areas                   | adj. <i>P</i> ><br>0.9999 |

**Table S3. Numbers of starter cells and input cells.**

| Mouse number      | No. starter cells | No. input cells | Input/starter cells |
|-------------------|-------------------|-----------------|---------------------|
| VGLUT2-#1         | 71                | 2902            | 40.87               |
| VGLUT2-#2         | 103               | 3325            | 32.28               |
| VGLUT2-#3         | 53                | 2394            | 45.17               |
| VGLUT2-#4         | 71                | 3237            | 45.59               |
|                   |                   |                 |                     |
| PV-#1             | 23                | 1523            | 66.22               |
| PV-#2             | 28                | 2602            | 92.93               |
| PV-#3             | 70                | 3650            | 52.14               |
| PV-#4             | 26                | 1550            | 59.62               |
|                   |                   |                 |                     |
| PKC- $\delta$ -#1 | 75                | 5436            | 72.48               |
| PKC- $\delta$ -#2 | 95                | 11026           | 116.06              |
| PKC- $\delta$ -#3 | 24                | 2554            | 106.42              |
| PKC- $\delta$ -#4 | 40                | 4777            | 119.43              |
|                   |                   |                 |                     |
| SST-#1            | 85                | 6127            | 72.08               |
| SST-#2            | 159               | 13501           | 84.91               |
| SST-#3            | 116               | 9519            | 82.06               |
| SST-#4            | 86                | 3235            | 37.62               |
